# Supplementary material for: Enhanced hydrogen evolution reaction via photoelectrochemical water splitting utilizing asymmetric MoSSe under a low external magnetic field
Source: Royal Society of Chemistry journal article supplement (doi:10.1039/d3ta03227b), 2023-01-01
Supplement: d3ta03227b1.pdf [file d3ta03227b1.pdf]

## **Supporting Material**

### **Enhanced Hydrogen Evolution Reaction *via* Photoelectrochemical Water Splitting Utilizing Asymmetric MoSSe under a Low External Magnetic Field**

Krishnendu Roy, Dibyendu Ghosh, Soumyajit Maitra, and Praveen Kumar\*

School of Materials Science, Indian Association for the Cultivation of Science, Kolkata-700032, India

\**Email for Correspondence: [praveen.kumar@iacs.res.in](mailto:praveen.kumar@iacs.res.in)*

**Table S1:** Experimental and computational Raman modes of MoSSe.

|       | Computation          |                      | Experiment           |                      |
|-------|----------------------|----------------------|----------------------|----------------------|
|       | $A_{1g}$             | $E_{2g}^1$           | $A_{1g}$             | $E_{2g}^1$           |
| MoSSe | 283 $\text{cm}^{-1}$ | 339 $\text{cm}^{-1}$ | 284 $\text{cm}^{-1}$ | 338 $\text{cm}^{-1}$ |

**Table S2:** Photocurrent of different PCs at two different biases.

| Photocathode                                       | Photocurrent density ( $j_p$ )<br>in $\text{mA}/\text{cm}^2$ @0V vs RHE | Photocurrent density ( $j_p$ ) in<br>$\text{mA}/\text{cm}^2$ @1.15 V vs RHE |
|----------------------------------------------------|-------------------------------------------------------------------------|-----------------------------------------------------------------------------|
| SiNW                                               | -0.2                                                                    | -4.48                                                                       |
| MoSe <sub>2</sub> /SiNW                            | -0.45                                                                   | -15.01                                                                      |
| MoS <sub>2</sub> /SiNW                             | -0.87                                                                   | -17.47                                                                      |
| MoSSe/SiNW                                         | -2.24                                                                   | -20.48                                                                      |
| MoSSe/SiNW @0.1T                                   | -2.98                                                                   | -21.98                                                                      |
| MoSSe/SiNW @0.2 T                                  | -3.44                                                                   | -24.73                                                                      |
| MoSSe/SiNW @0.4 T                                  | -4.40                                                                   | -27.08                                                                      |
| MoSSe/SiNW @0.5 T                                  | -4.81                                                                   | -27.52                                                                      |
| Mo <sub>2</sub> CT <sub>x</sub> /MoSSe/SiNW        | -3.69                                                                   | -23.50                                                                      |
| Mo <sub>2</sub> CT <sub>x</sub> /MoSSe/SiNW @0.4 T | -5.61                                                                   | -32.25                                                                      |

**Table S3:** Built-in potential of different PCs from Mott-Schottky analyses.

| Photocathode                                | Built-in potential in V (vs RHE) |
|---------------------------------------------|----------------------------------|
| SiNW                                        | -0.26                            |
| MoSe <sub>2</sub> /SiNW                     | -0.018                           |
| MoS <sub>2</sub> /SiNW                      | 0.15                             |
| MoSSe/SiNW                                  | 0.27                             |
| Mo <sub>2</sub> CT <sub>x</sub> /MoSSe/SiNW | 0.40                             |

**Table S4:** Comparison of onset potential and photocurrent density among different photocathodes for PEC HER.

| Materials                                                                            | Electrolyte                                              | Onset potential V vs RHE | $J_{\text{photo}}$ mA/cm <sup>2</sup> | Year | Ref.      |
|--------------------------------------------------------------------------------------|----------------------------------------------------------|--------------------------|---------------------------------------|------|-----------|
| Cu <sub>2</sub> O/Ga <sub>2</sub> O <sub>3</sub> /TiO <sub>2</sub> /RuO <sub>x</sub> | potassium phosphate solution with a pH 7 buffer solution | 0.92                     | -8.6 @0V vs RHE                       | 2022 | 1         |
| VS <sub>2</sub> /SiNW                                                                | Neutral electrolyte pH 7                                 | 0.874                    | -17 @ -0.53 V vs RHE                  | 2022 | 2         |
| CuInS <sub>2</sub> /CdS/MoS <sub>2</sub>                                             | 0.1 M Na <sub>2</sub> SO <sub>4</sub>                    | 0.86                     | -1.75 @ 0 V vs RHE                    | 2023 | 3         |
| Pt/TiO <sub>2</sub> /CdS/Sb <sub>2</sub> Se <sub>3</sub> /Au/FTO                     | 0.5 M H <sub>2</sub> SO <sub>4</sub>                     | 0.5                      | ~ -23@0 V vs RHE                      | 2020 | 4         |
| Mo <sub>2</sub> CT <sub>x</sub> /MoSSe/Si NW                                         | 0.5 M H <sub>2</sub> SO <sub>4</sub>                     | 0.42                     | -3.69 @0 V vs RHE                     | 2023 | This work |
| Mo <sub>2</sub> CT <sub>x</sub> /MoSSe/Si NW @ 0.4 T magnetic field                  | 0.5 M H <sub>2</sub> SO <sub>4</sub>                     | 0.35                     | -5.61@0 V vs RHE                      | 2023 | This work |
| Si/MoS <sub>x</sub>                                                                  | 0.5 M H <sub>2</sub> SO <sub>4</sub>                     | 0.31                     | -28.2 @ 0 V vs RHE                    | 2021 | 5         |
| Si NW/NiCo <sub>2</sub> S <sub>4</sub>                                               | 0.5 M H <sub>2</sub> SO <sub>4</sub>                     | ~ 0.3                    | -15 @ -0.8 V vs RHE                   | 2023 | 6         |
| SiNWs@MoS <sub>2</sub> /NiS <sub>2</sub>                                             | 0.5 M Na <sub>2</sub> SO <sub>4</sub>                    | 0.3                      | -21.4 @ -0.9 V vs RHE                 | 2023 | 7         |
| FTO/Au/Sb <sub>2</sub> Se <sub>3</sub> /TiO <sub>2</sub> /Pt                         | 0.5 M H <sub>2</sub> SO <sub>4</sub>                     | 0.3                      | -11.3@ 0 V vs RHE                     | 2021 | 8         |
| Si/MoS <sub>2</sub>                                                                  | 0.5 M H <sub>2</sub> SO <sub>4</sub>                     | 0.25                     | -30 @ 0V vs RHE                       | 2021 | 9         |
| MoS <sub>2</sub> /MoSe <sub>2</sub> /SiNW                                            | 0.5 M H <sub>2</sub> SO <sub>4</sub>                     | 0.23                     | -0.9 @ 0 V vs RHE                     | 2022 | 10        |

|                                                            |                                      |       |                        |      |    |
|------------------------------------------------------------|--------------------------------------|-------|------------------------|------|----|
| SiNW/Au/CoS                                                | 0.5 M H <sub>2</sub> SO <sub>4</sub> | 0.2   | -33.1 @ 0 V vs RHE     | 2023 | 11 |
| TiS <sub>2</sub> QDs/WS <sub>2</sub> /polydimethylsiloxane | 0.5 M H <sub>2</sub> SO <sub>4</sub> | 0.038 | ~ -4.1 @ -0.2 V vs RHE | 2023 | 12 |

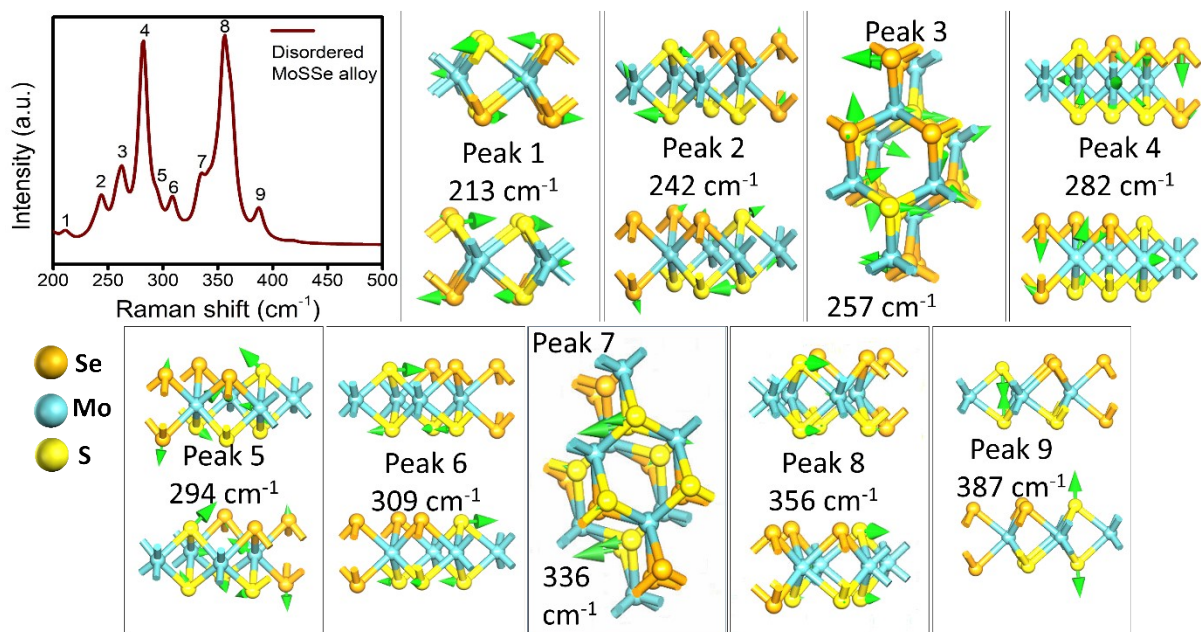

**Fig. S1.** Raman spectrum of randomized disordered MoSSe alloy simulated by DFT and Raman vibrational mode corresponding to every peak. The representative atomic colours of Mo, S, and Se are given.

**Supporting Material Note 1:** The different peaks in Fig. S1 originated due to different contributions. Peak 1 is due to an in-plane stretching characteristic of the  $E_{2g}^1$  mode of Janus MoSSe (213 cm<sup>-1</sup>). Peak 2 is due to out-of-plane  $A_{1g}$ -like vibration from the MoSe<sub>2</sub> fragments and  $E_{1g}^1$  like in-plane asymmetric stretching from the MoS<sub>2</sub> fragments (242 cm<sup>-1</sup>). In-plane  $E_{2g}^1$  mode from MoSe<sub>2</sub> fragment coupled with out-of-plane stretching of MoSSe units causes peak 3 (257 cm<sup>-1</sup>). Peak 4 is caused by out-of-plane anti-symmetric bending of the Se-Mo-Se bond (282 cm<sup>-1</sup>).  $A_{1g}^1$  like the out-of-plane motion of the Se atoms from the MoSe<sub>2</sub> impurity fragment coupled to the out-of-plane bending mode of the S-Mo-S fragment (294 cm<sup>-1</sup>) gives rise to peak 5. Peak 6 is due to the antisymmetric in-plane bending of the S-Mo-S unit coupled with the antisymmetric in-plane  $E_{1g}$ -like stretching of MoS<sub>2</sub> fragments (309 cm<sup>-1</sup>). Peak 7, 8, and 9 are due to the in-plane wagging motion of S atoms from the MoS<sub>2</sub> and MoSSe fragments

(336  $\text{cm}^{-1}$ ), in-plane  $E_{2g}^2$  vibrational mode of Janus MoSSe (356  $\text{cm}^{-1}$ ) and out-of-plane MoS<sub>2</sub> vibration (387  $\text{cm}^{-1}$ ), respectively.

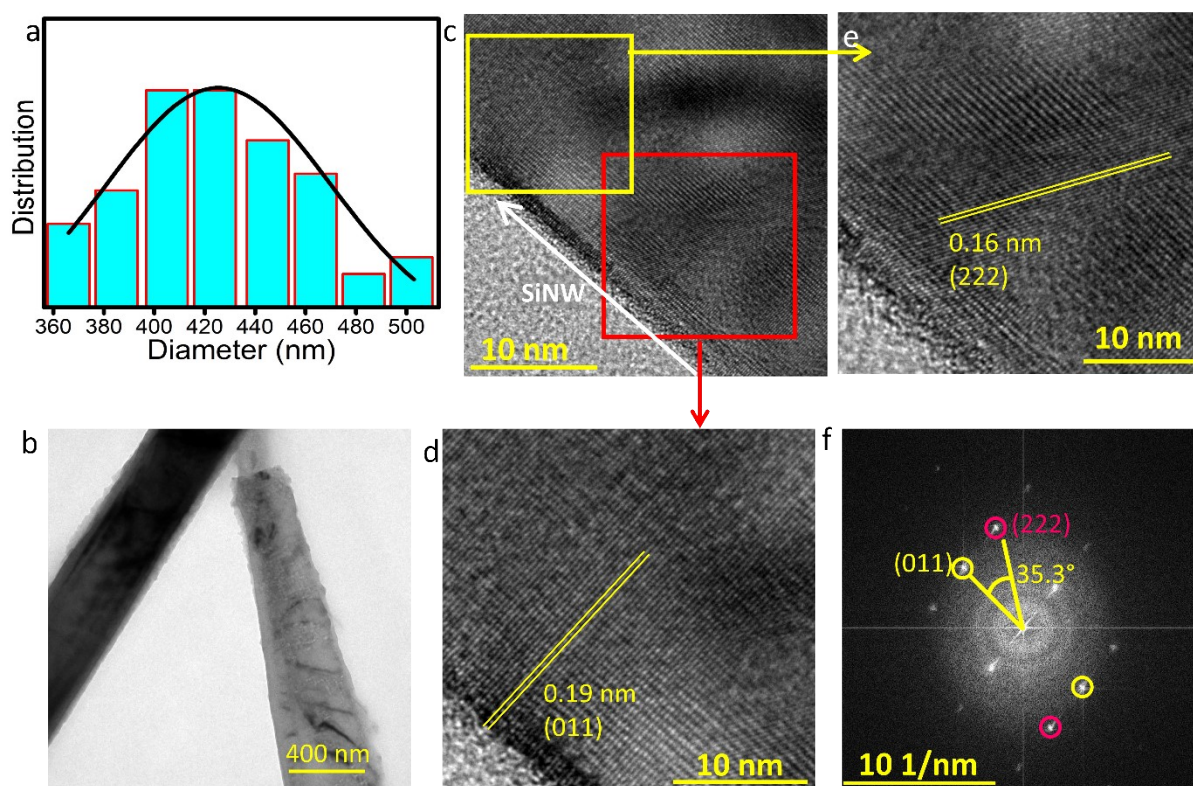

**Fig. S2.** Morphological analysis of SiNW. (a) SiNW diameter distribution. (b) TEM image of SiNW having a uniform cross-section. (c) HRTEM image showing the lattice fringes for Si, (d) zoomed yellow marked region of Fig. S2c and (e) zoomed red marked region of Fig. S2c, (f) FFT pattern of Fig. S2c.

**Supporting Material Note 2:** Fig. S2a demonstrates the diameter distribution of SiNWs, and the average diameter is 426 nm. Fig. S2b exhibits the TEM image of SiNW with a diameter of 414 nm, consistent with the average diameter obtained from the SEM image. From the HRTEM image of SiNW Fig. S2c, the high crystallinity of nanowire is comprehensible, which matches well with the X-ray diffraction (XRD) spectra in Fig. S3a. The lattice fringes for Si(011) plane are distinctly visible (Fig. S2d) with a lattice spacing of 0.19 nm, which corroborates the nanowire formation in the [011] direction. The lattice fringes for Si(222) plane are clearly visible with a lattice spacing of 0.16 nm in Fig. S2e which is expected since the nanowire is etched in the Si(111) plane. Bright points in the Fast Fourier transform (FFT) (Fig. S2f) manifest the corresponding (011) plane and (222) plane along with the angle between them which matches well with the theoretical value.

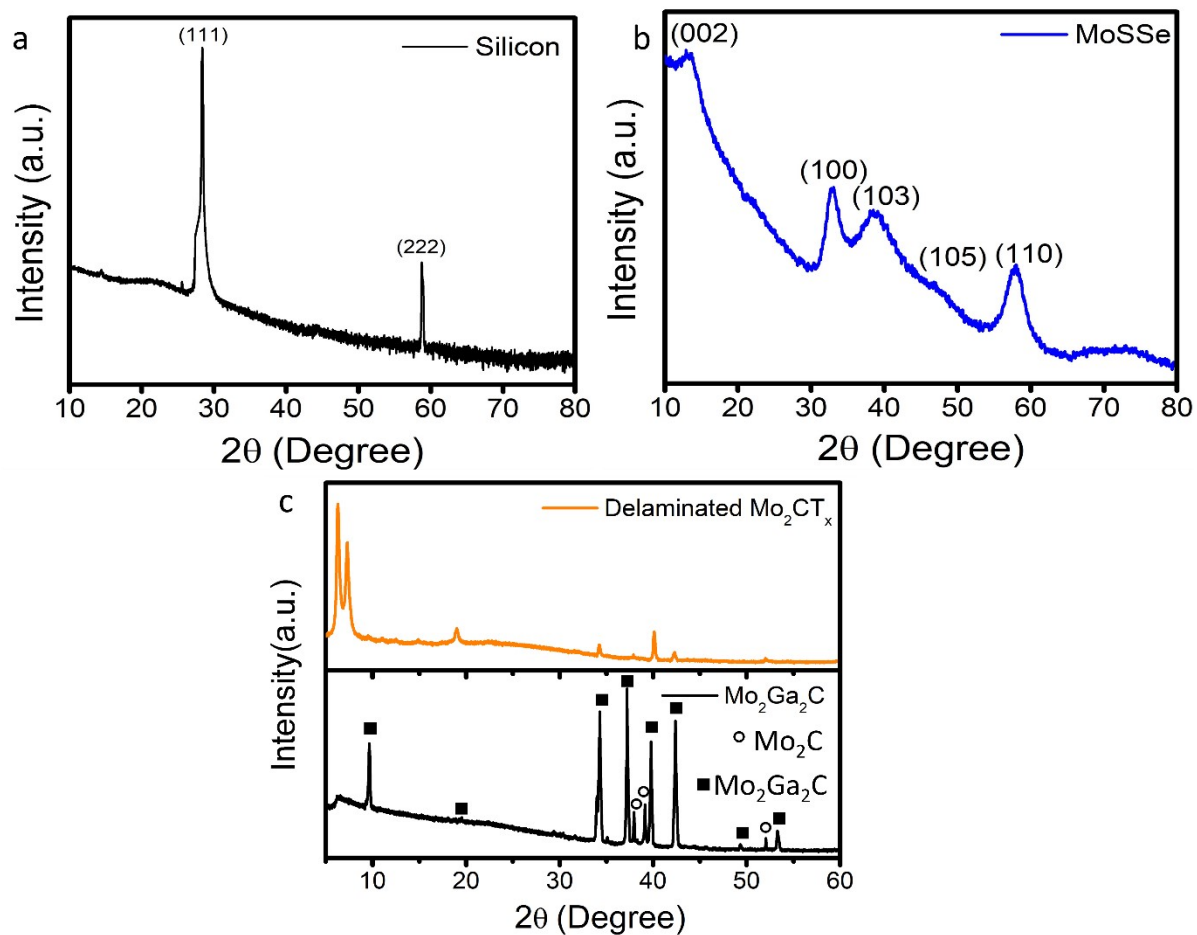

**Fig. S3.** X-ray diffractogram of (a) SiNW (b) MoSSe and (c)  $\text{Mo}_2\text{CT}_x$  Mxene and its MAX phase  $\text{Mo}_2\text{Ga}_2\text{C}$ .

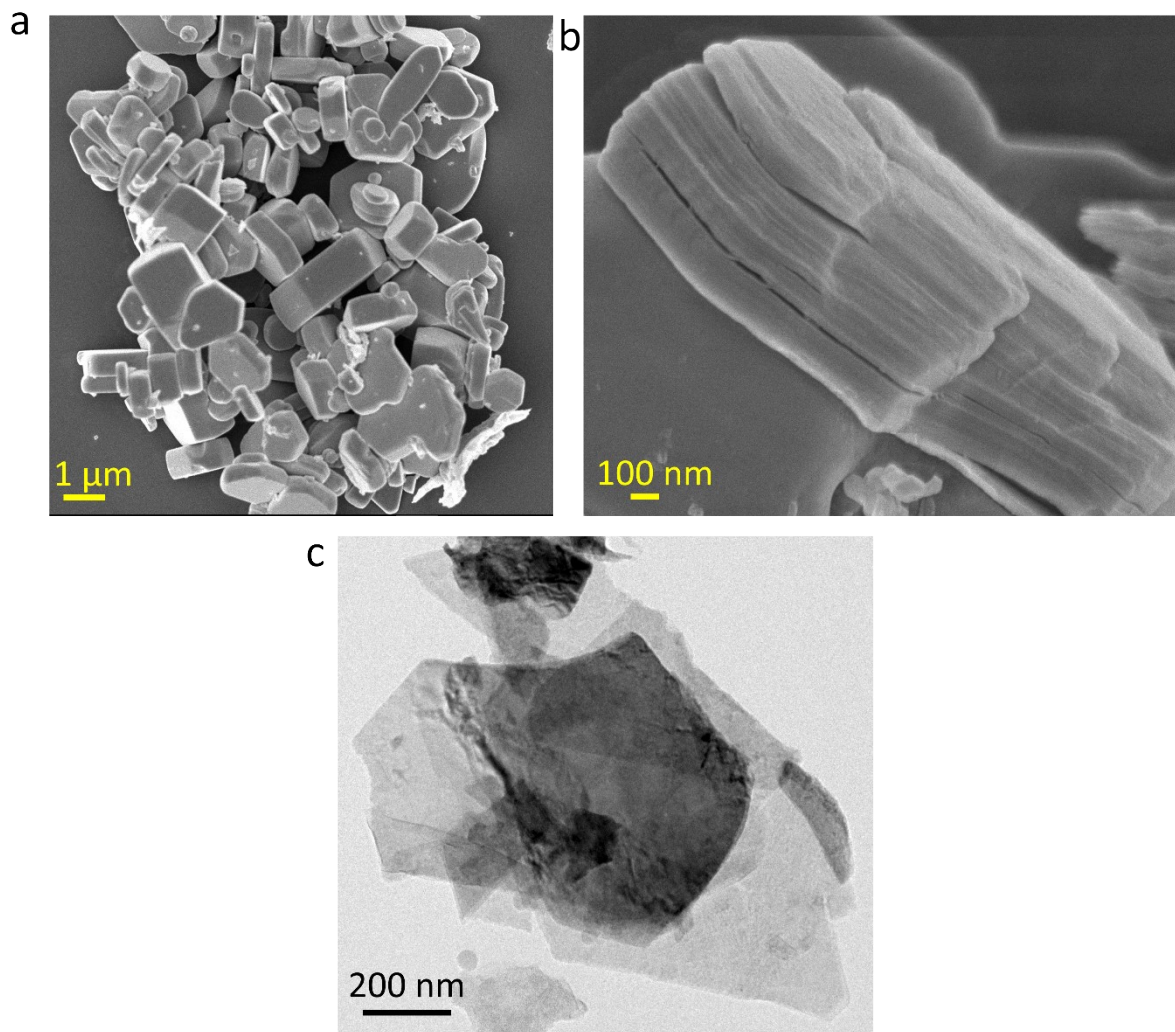

**Fig. S4.** Morphological characterization of  $\text{Mo}_2\text{Ga}_2\text{C}$  MAX and  $\text{Mo}_2\text{CT}_x$  MXene. (a) SEM of  $\text{Mo}_2\text{Ga}_2\text{C}$  MAX phase powder and (b)  $\text{Mo}_2\text{CT}_x$  non-delaminated MXene. (c) TEM image of delaminated  $\text{Mo}_2\text{CT}_x$  MXene.

**Supporting Material Note 3:** To understand the overall morphology of the synthesized  $\text{Mo}_2\text{Ga}_2\text{C}$  MAX phase and  $\text{Mo}_2\text{CT}_x$  MXene (without and with delamination), we have performed the following characterization. Fig. S4a is showing the morphology of  $\text{Mo}_2\text{Ga}_2\text{C}$  MAX phase. After etching of MAX phase, the quintessential layered structure of  $\text{Mo}_2\text{CT}_x$  MXene is revealed by the SEM image (Fig. S4b). Fig. S4c shows  $\text{Mo}_2\text{CT}_x$  MXene in its delaminated form with few-layer thickness.

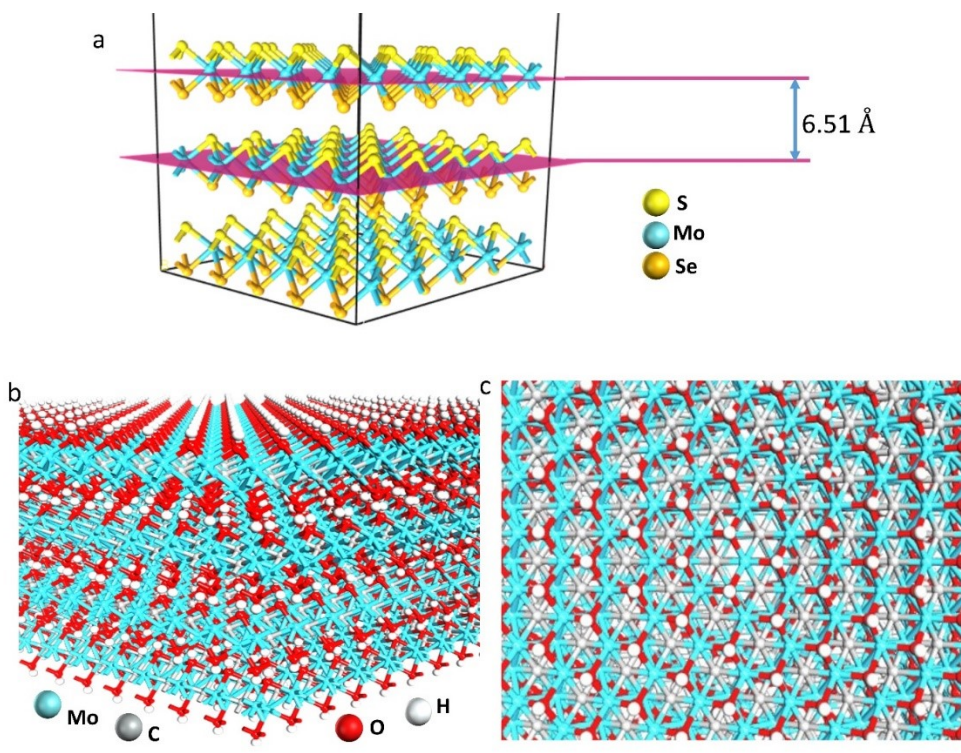

**Fig. S5.** Atomic structure illustration of (a) 3-layer MoSSe indicating interlayer distance. (b) Mo<sub>2</sub>C MXene with the functional group (-OH) with side and (c) top view. The representative atomic colours of Mo, C, O, and H are given.

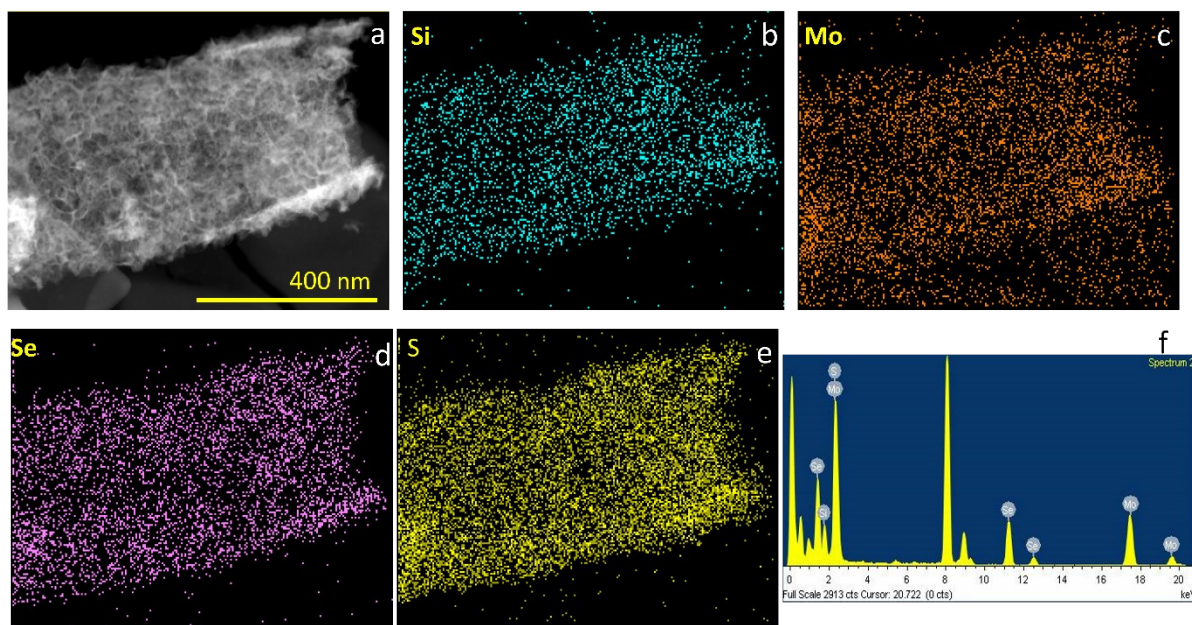

**Fig. S6.** Elemental analysis. (a) HAADF-STEM image of Mo<sub>2</sub>CT<sub>x</sub>/MoSSe/SiNW and corresponding mapping of (b) Si, (c) Mo, (d) Se and (e) S. (f) Associated EDX spectra.



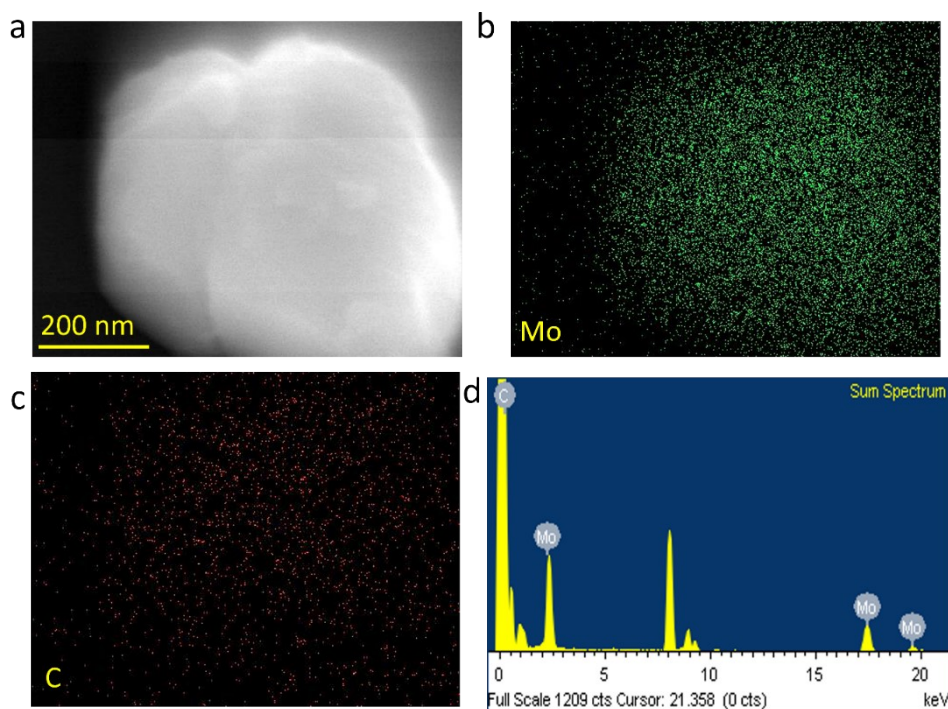

**Fig. S7.** SEM-EDS mapping of Mo<sub>2</sub>CT<sub>x</sub> Mxene. (a) Associated image and mapping of (b) Mo, (c) C, and (d) corresponding EDX spectra.

**Supporting Material Note 4:** Detailed elemental analyses are carried out to understand the elementwise distribution of MoSSe and Mo<sub>2</sub>CT<sub>x</sub>. HAADF-STEM image of MoSSe grown SiNW decorated with Mo<sub>2</sub>C-T<sub>x</sub> is shown in Fig. S6a, and the corresponding elemental maps of Si (16.86 atomic %), Mo (45.60 atomic %), Se (18.22 atomic %), S (19.33 atomic %) are shown in Fig. S6b,c,d,e respectively, that corroborates uniform and homogenous distribution of the constituents. The associated energy-dispersive X-ray spectroscopy (EDX) data is displayed in Fig. S6f. SEM-EDX analysis of Mo<sub>2</sub>C shows SEM image (Fig. S7a) and corresponding mapping of elemental Mo (63.33 atomic %) and C (36.67 atomic %) (Fig. S7b,c respectively), which elucidates uniform distribution of Mo and C and no presence of Ga, i.e., it is successfully etched out (EDX spectra is shown in Fig. S7d).

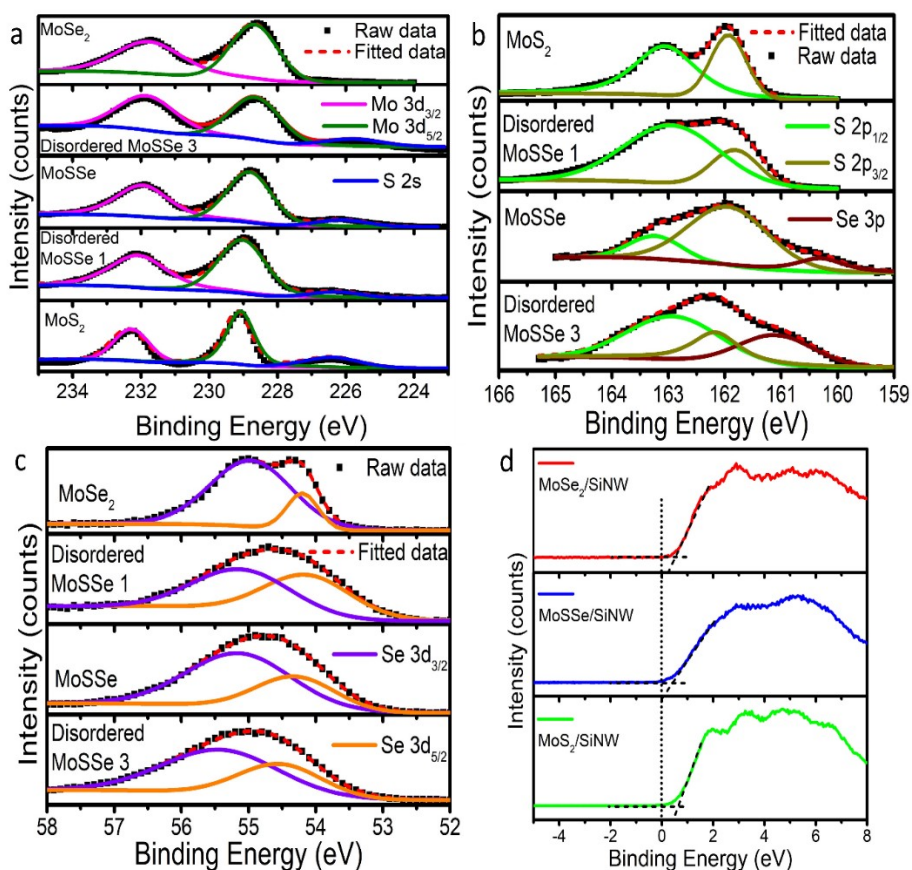

**Fig. S8.** XPS spectra for (a) Mo 3d, (b) S 2p and (c) Se 3d of MoSe<sub>2</sub>/Si, MoSSe 1/Si, MoSSe 3/Si, MoSSe/Si and MoS<sub>2</sub>/Si as mentioned above in the plot. (d) Valence band spectra of different photocathodes.

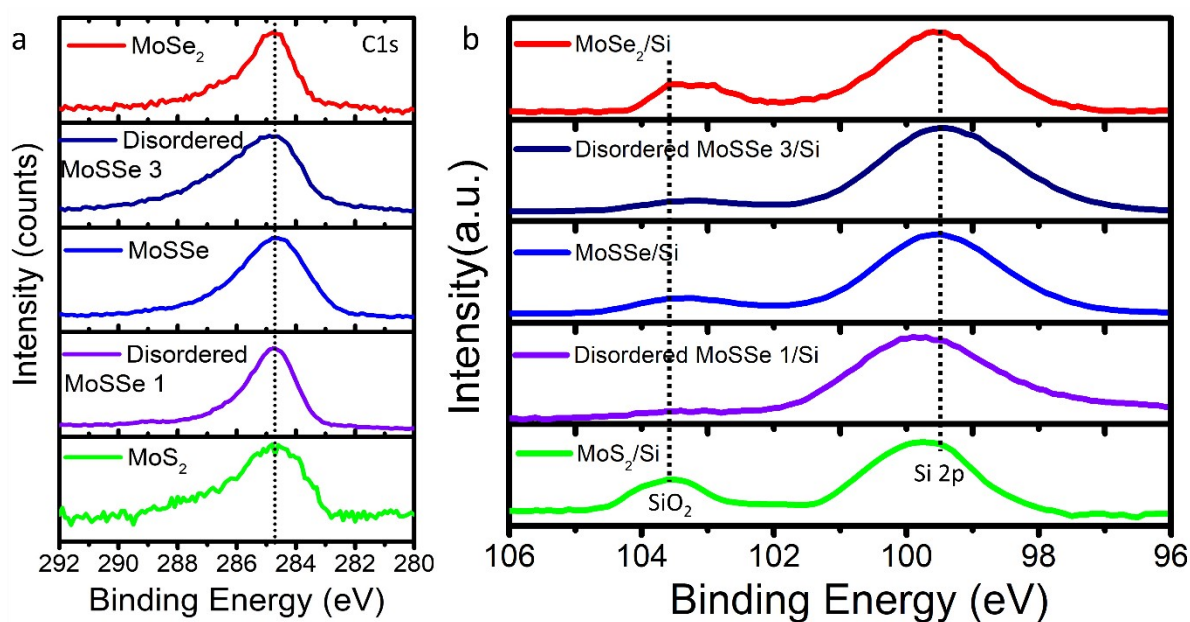

**Fig. S9.** (a) XPS spectra for C1s peak correction and (b) Si 2p.

**Supporting Material Note 5:** To investigate the chemical states of molybdenum and chalcogen (S, Se), XPS analysis has been carried out. Distinguishing various oxidation states or elements helps to identify the systematic evolution from symmetrical  $\text{MX}_2$  ( $\text{MoS}_2$ ,  $\text{MoSe}_2$ ) to asymmetrical  $\text{MXY}$  ( $\text{MoSSe}$ ). For the sake of clarity, C1s peaks were corrected to 284.4 eV for all the samples (Fig. S9a). The high-resolution narrow spectrum for Mo ( $3d_{5/2}$  and  $3d_{3/2}$ ) is located in the binding energy range 228–232 eV, which is characteristic of the  $\text{Mo}^{+4}$  oxidation state (Fig. S8a). Now, if we start from  $\text{MoS}_2$  having Mo  $3d_{5/2}$  peak at  $\sim 229.10$  eV and Mo  $3d_{3/2}$  peak at  $\sim 232.62$  eV, we can observe a gradual shift of both Mo  $3d_{5/2}$  and Mo  $3d_{3/2}$  peaks to lower binding energy as Se is added systematically in the  $\text{MoS}_2$  matrix. The shift in binding energy could be attributed to the difference in electronegativity between Se and S atoms, indicating a slight change in the oxidation state of Mo. Interestingly, the spin-orbit splitting energy ( $\Delta E$ )  $\sim 3.14$  eV typical for  $\text{Mo}^{+4}$  oxidation state is best suited for the Janus  $\text{MoSSe}$ . Along with the Mo 3d peak, a small peak for S2s peak is also visible except for  $\text{MoSe}_2$ . The deconvoluted XPS peaks of S 2p provide prominent  $2p_{1/2}$  and  $2p_{3/2}$  peaks (Fig. S8b) for  $\text{MoS}_2$  and disordered  $\text{MoSSe}$  1, whereas additional peaks correspond to Se 3p could be observed starting from Janus  $\text{MoSSe}$ . In the case of disordered  $\text{MoSSe}$  3, the Se 3p peak is more dominating than the intensity ratio  $2p_{1/2}/2p_{3/2}$  has been altered, signifying a disordered structure. The Se3d peak is (Fig. S8c) also deconvoluted to  $\text{Se}3d_{5/2}$  and  $\text{Se}3d_{3/2}$  in the binding energy range 57.5–52.4 eV.

From the XPS spectra of Si 2p of the heterostructure over SiNW, Si-Si bonding is found as obvious and also the signature of little  $\text{SiO}_2$  (Fig. S9b) is found. The main origin of  $\text{SiO}_2$  is due to nanowire formation. The valance band spectra (Fig. S8d) indicated higher valance band maxima (VBM) position with respect to Fermi level ( $E_f$ ) for  $\text{MoS}_2/\text{SiNW}$  (0.51 eV) and  $\text{MoSe}_2/\text{SiNW}$  (0.56 eV) compared to  $\text{MoSSe}/\text{SiNW}$  (0.43 eV). Smaller VBM position *w.r.t*  $E_f$

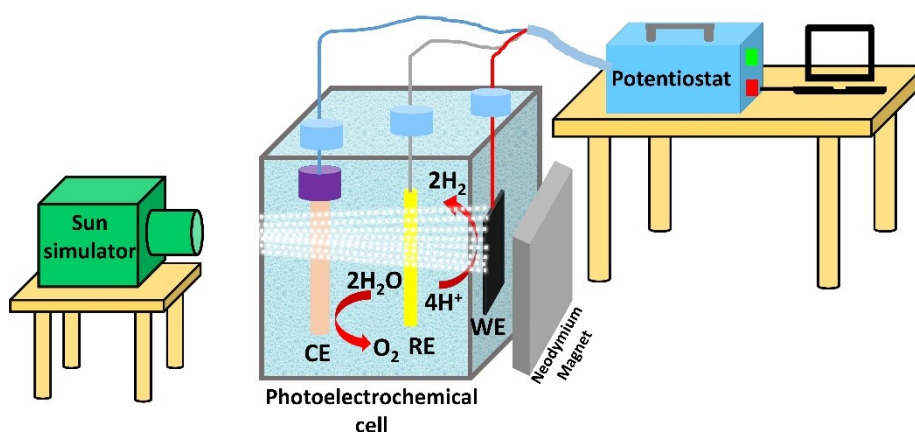

**Fig. S10.** Schematic representation of PEC cell, sun simulator and external magnet.

facilitates electron flow due to lower band bending. Also, the VBM position *w.r.t*  $E_f$  indicated a perfect p-type nature ideal for water reduction.

**Supporting Material Note 6:** The setup for applying a magnetic field to the photocathode in the photoelectrochemical (PEC) cell, along with the magnet arrangement, is schematically illustrated in Figure S10. A neodymium permanent magnet was positioned in parallel with the backside of the photocathode, just outside the PEC cell, for both photo and dark conditions. The magnetic field strength was varied by adjusting the distance between the magnet and the photocathode or by using magnets with different magnetic strengths. To maintain consistency, the magnet was held in a specific orientation throughout the entire photoelectrochemical measurement. The south pole of the magnet was oriented to face the backside of the photocathode, while the north pole faced outward. Although there was a minimal difference when the arrangement was reversed, with the north pole facing the backside of the photocathode and the south pole outward, the former orientation was selected for all photoelectrochemical measurements. To quantify the strength of the magnetic field, a gauss meter was employed for accurate measurements.

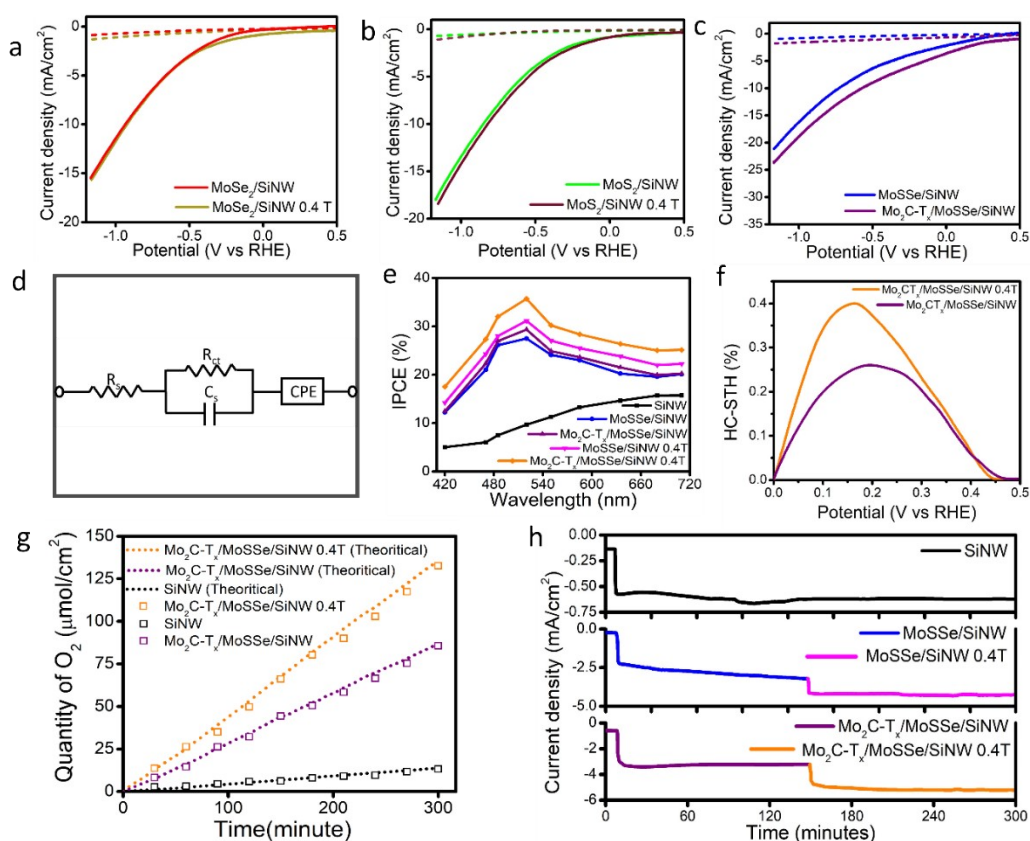

**Fig. S11.** (a) LSV plot of  $\text{MoSe}_2/\text{SiNW}$  PC with and without magnetic field. (b) LSV plot of  $\text{MoS}_2/\text{SiNW}$  PC with and without magnetic field. (c) LSV plot to compare between

MoSSe/SiNW PC and Mo<sub>2</sub>CT<sub>x</sub>/MoSSe/SiNW PC. (d) EIS fitting circuit. (e) Efficiency calculations for SiNW, MoSSe/SiNW PC and Mo<sub>2</sub>CT<sub>x</sub>/MoSSe/SiNW PCs (with and without

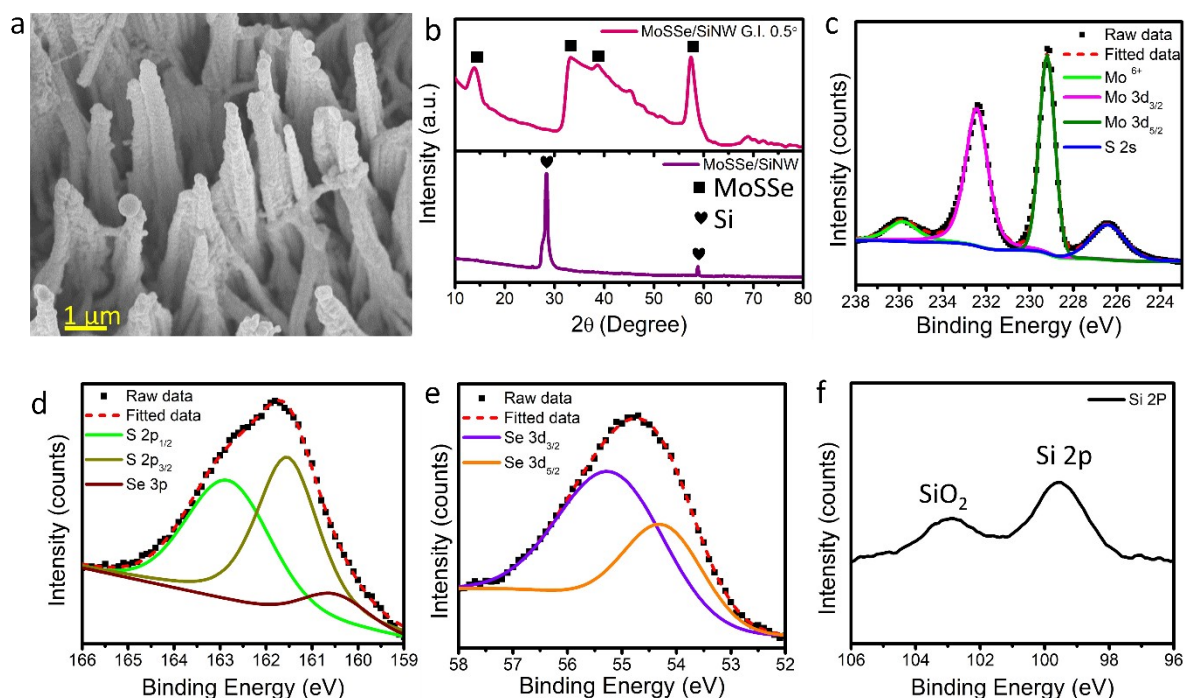

**Fig. S12.** Characterization for morphology, crystal phase and valence after PEC reaction. (a) SEM image of MoSSe grown SiNWs. (b) Grazing incident angle XRD of MoSSe/SiNW array. XPS spectra for (c) Mo 3d, (d) S 2p, (e) Se 3d and (f) Si 2p.

magnetic field) at various incident light wavelength. (f) HC-STH of Mo<sub>2</sub>CT<sub>x</sub>/MoSSe/SiNW PC with and without magnetic field. (g) Product O<sub>2</sub> gas quantification. (h) Stability of different PCs with and without magnetic field.

**Supporting Material Note 7:** Incident photon-to-current efficiency was calculated following the below equation:

$$IPCE = \frac{I_{ph}(A\ cm^{-2})}{P_{in}(W\ cm^{-2})} \times \frac{1240}{\lambda(nm)} \times 100\%$$

Where  $I_{ph}$  is photocurrent density,  $P_{in}$  is the input power,  $\lambda$  is the wavelength of incident light.

HC-STH efficiency was calculated following the below equation:

$$HC - STH = \frac{|(j_p - j_d)| \times (E_{RHE} - E_{H^+/H_2}) \times 100}{P_{in}} \%$$

Where  $j_p$  and  $j_d$  is the current density under photo illumination and dark respectively at  $E_{RHE}$ ,  $E_{H^+/H_2}$  is 0 V<sub>RHE</sub>,  $P_{in}$  is the input power of the AM 1.5 solar spectrum.

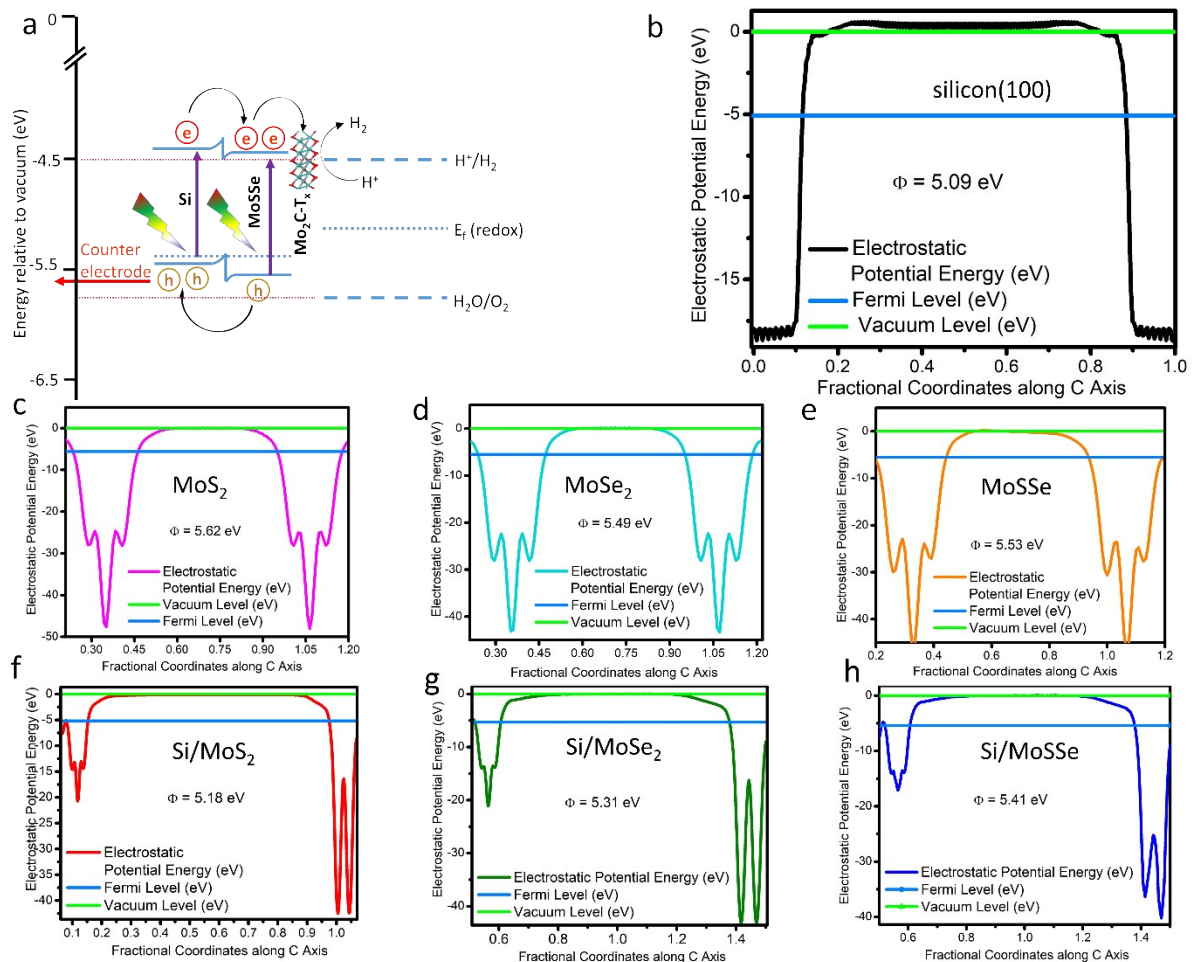

**Fig. S13.** (a) Energy band alignment of  $Mo_2CT_x/MoSSe/SiNW$  PC. Electrostatic potential energy profile of (b) silicon (100), (c)  $MoS_2$ , (d)  $MoSe_2$ , (e)  $MoSSe$ , (f)  $Si(100)/MoS_2$ , (g)  $Si(100)/MoSe_2$ , (h)  $Si(100)/MoSSe$ .

**Supporting Material Note 8:** The energy band diagram of  $\text{Mo}_2\text{CT}_x/\text{MoSSe}/\text{SiNW}$  PC is shown in Fig. S13a. The excited photo carriers from silicon move towards MoSSe. The excited photocarrier of MoSSe along with those electrons received from Si efficiently channelled to water (electrolyte) through  $\text{Mo}_2\text{CT}_x$  Mxene having high metallic conductivity. On the other hand, holes from MoSSe move towards Si and finally in the direction of a counter electrode *via* an external circuit. In order to propose the energy band alignment, we have calculated the electrostatic potential energy profile of pristine materials and their heterostructures as well. The work function of different materials and their heterostructure are found to be 5.09 eV, 5.62 eV, 5.49 eV, 5.53 eV, 5.18 eV, 5.31 eV and 5.41 eV for silicon (100) (Fig. S13b),  $\text{MoS}_2$  (Fig. S13c),  $\text{MoSe}_2$  (Fig. S13d), MoSSe (Fig. S13e), Si(100)/ $\text{MoS}_2$  (Fig. S13f), Si(100)/ $\text{MoSe}_2$  (Fig. S13g) and Si(100)/MoSSe (Fig. S13h), respectively.

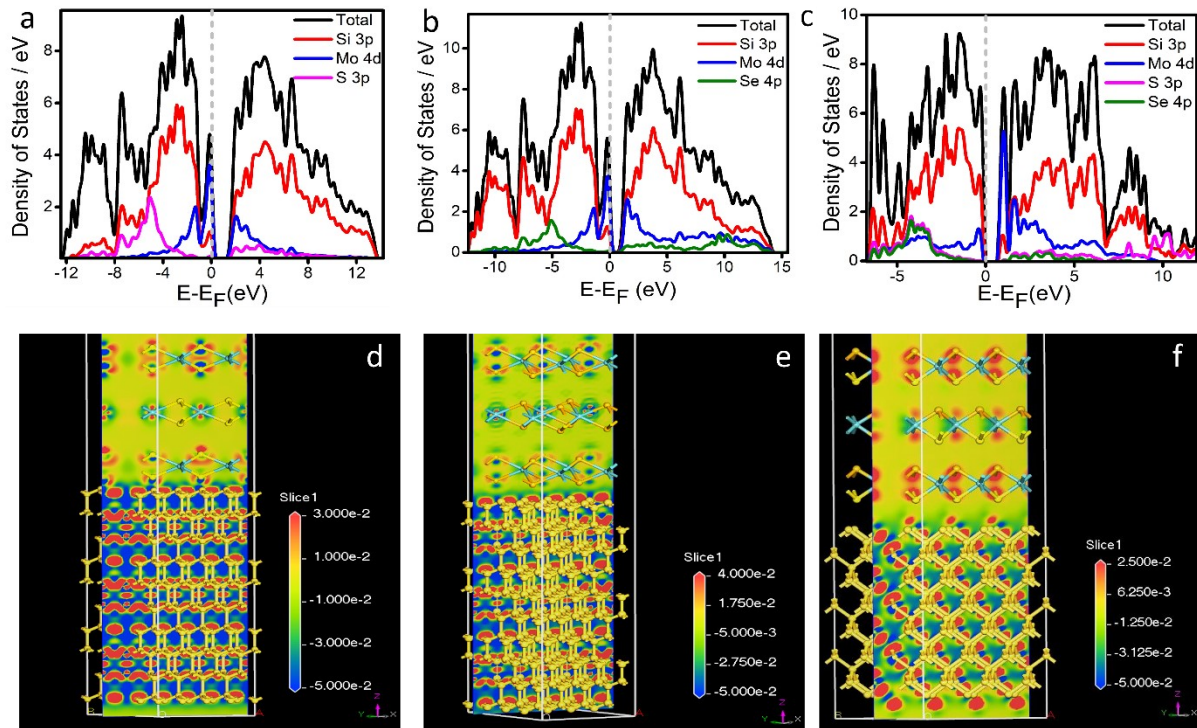

**Fig. S14.** PDOS plot of (a)  $\text{MoS}_2/\text{Si}$ , (b)  $\text{MoSe}_2/\text{Si}$ , (c)  $\text{MoSSe}/\text{Si}$ . EDD slice of (d)  $\text{MoS}_2/\text{Si}$ , (e)  $\text{MoSe}_2/\text{Si}$  and (f)  $\text{MoSSe}/\text{Si}(100)$

**Supporting Material Note 9:** PDOS and EDD simulations have been carried out to understand hybridization at the interface and charge transfer between the two layers. From the PDOS plots of  $\text{MoS}_2/\text{Si}$  (Fig. S14a) and  $\text{MoSe}_2/\text{Si}$  (Fig. S14b), it can be observed that both the VBM and conduction band minima (CBM) have a significant contribution from the Mo 4d orbitals indicating that the band edges in the heterostructure are dominated by  $\text{MoS}_2$  and  $\text{MoSe}_2$  respectively. In both  $\text{MoS}_2$  and  $\text{MoSe}_2$ , the valence band (VB) shows an overlap between the

Si 3p and Mo 4d orbitals indicating a Si-Mo 3p-4d hybridization acting as a charge transfer pathway between the two layers. In addition to that, an overlap between the Si 3p-S 3p and Si 3p-Se 4p for MoS<sub>2</sub> and MoSe<sub>2</sub>, respectively have been observed, indicating a significant degree of hybridization between the Se and S atoms with Si at the interface, since the MoS<sub>2</sub> and MoSe<sub>2</sub> are connected to the Si surface via the S and Se atoms respectively. However, the extent of overlap between the Se 4p and Si 3p is lower compared to S 3p and Si 3p due to the higher energy gap between the 3p and 4p orbitals resulting in poor hybridization compared to S 3p whose energy level is closer to Si 3p. In MoSSe/Si, an additional hybridization between the S and Se atoms (Fig. S14c) has been observed as expected for Janus materials. Mulliken population analysis along with EDD plots have been carried out for analyses of charge transfer pathways in the heterostructure. A charge of  $-0.21|e|$  was transferred from Si to MoS<sub>2</sub> for Fermi level equilibration since the work function of MoS<sub>2</sub> is higher than Si. From the EDD plot (Fig. S14d), an electron density enrichment over the S atoms in the MoS<sub>2</sub> layer has been observed simultaneously with an electron density depletion over the Si atoms at the interface indicated by the blue color of the EDD plot at the interface. Hybridization of MoSe<sub>2</sub> with Si was observed to be relatively poor with a charge transfer of  $-0.14|e|$  from the Si to Se atoms (Fig. S14e). In both cases, it was observed that the lowermost layer was the most active participant in charge transfer and hybridization while the upper layers remained unchanged in electron density. A very high charge transfer of  $-0.27|e|$  and  $-0.29|e|$  was observed for MoSSe/Si(111) and MoSSe/Si(100) (Fig.S14f), which is most likely due to the presence of an additional S-Se hybridization pathway.



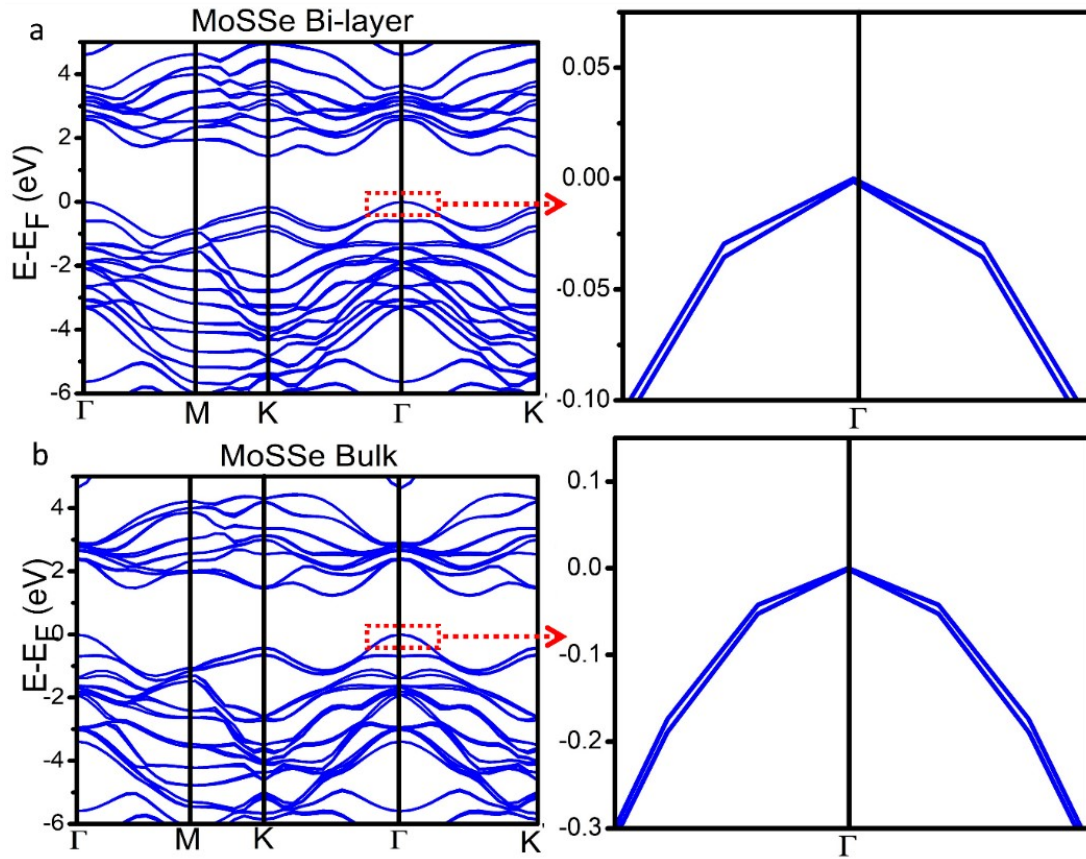

**Fig. S15.** (a) Band structure of bi-layer MoSSe, zoomed red marked region at right showing Rashba splitting at  $\Gamma$  point. (b) Band structure of bulk MoSSe, zoomed red marked region at right showing Rashba splitting at  $\Gamma$  point.

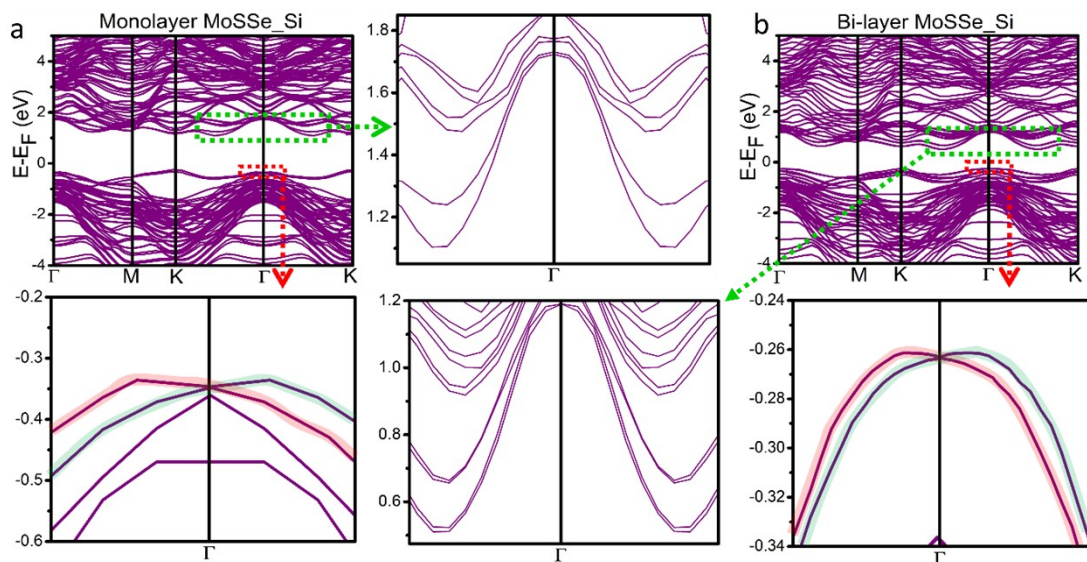

**Fig. S16.** (a) Band structure of monolayer MoSSe/Si, zoomed green marked region at the right side, shows Zeeman splitting at  $Q/Q'$  point and zoomed red marked region is showing Rashba splitting below. (b) Band structure of bi-layer MoSSe/Si, zoomed green marked region at

diagonally left shows Zeeman splitting at Q/Q' point and zoomed red marked region is showing Rashba splitting below.

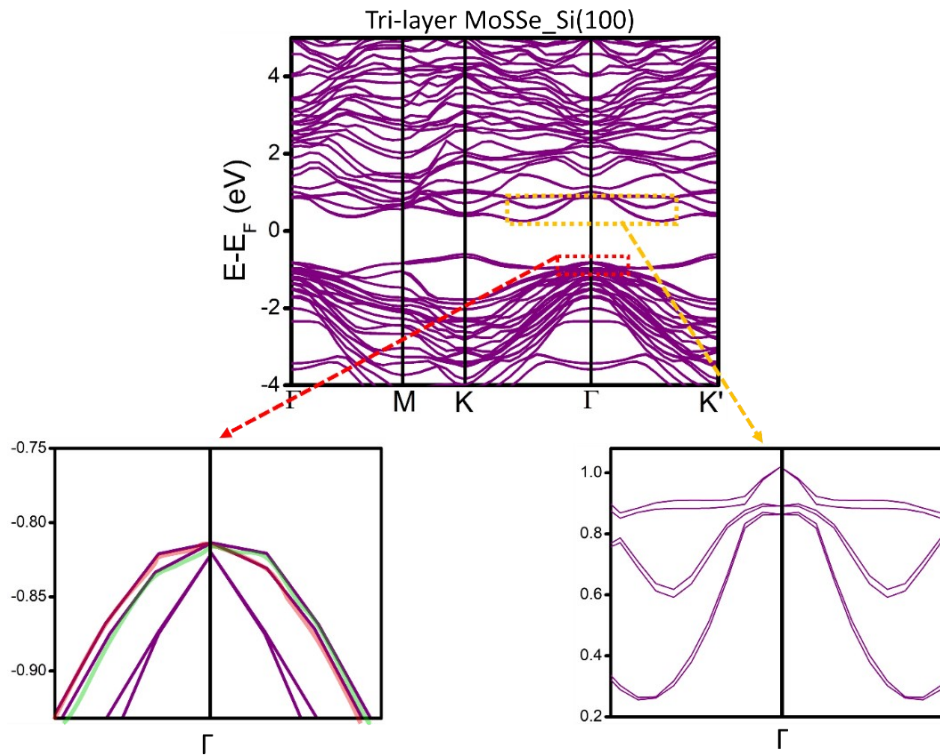

**Fig. S17.** Band structure of trilayer MoSSe/Si(100), zoomed yellow marked region at the right side, shows Zeeman splitting at Q/Q' point and zoomed red marked region is showing Rashba splitting below.

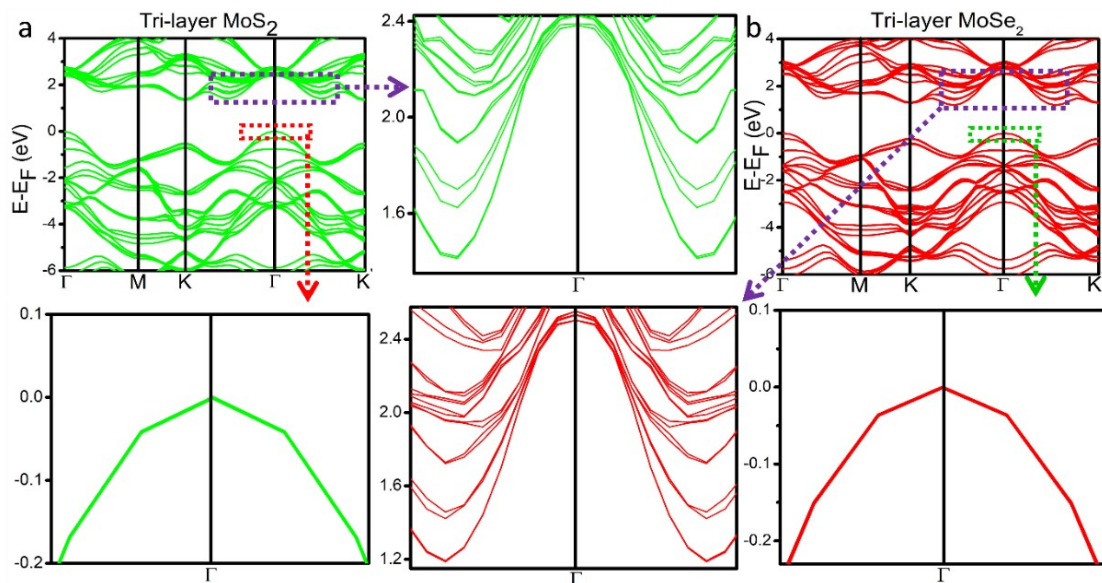

**Fig. S18.** (a) Band structure of trilayer MoS<sub>2</sub>, zoomed violet marked region at the right side shows insignificant Zeeman splitting at Q/Q' point and zoomed red marked region is showing no Rashba splitting below. (b) Band structure of trilayer MoSe<sub>2</sub>, zoomed violet marked region

at diagonally left shows insignificant Zeeman splitting at Q/Q' point and zoomed green marked region is showing no Rashba splitting below.

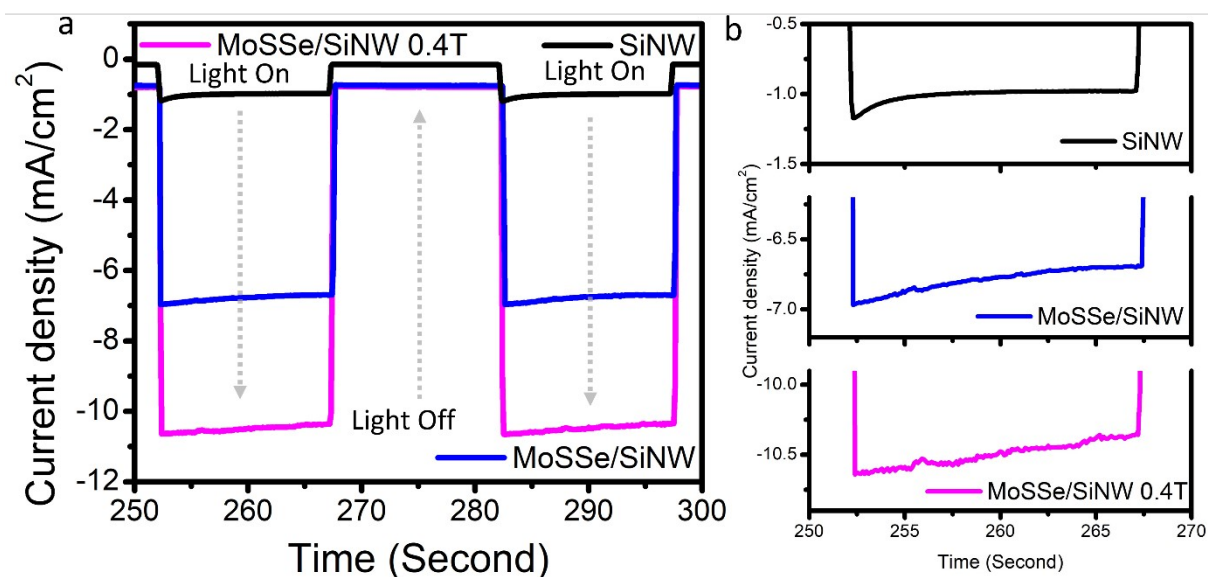

**Fig.S19.** (a) Photo response through chronoamperometry under chopped illumination. (b) Zoomed region of 15 second light on period of Fig. S19a.

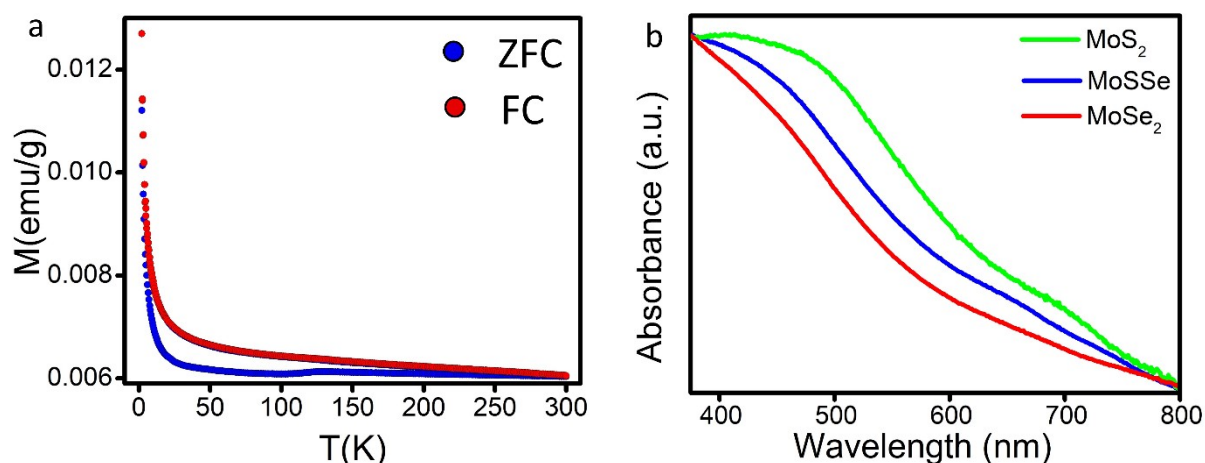

**Fig. S20.** (a) ZFC-FC plot of MoSSe. (b) UV-Vis-NIR absorption spectra of MoS<sub>2</sub>, MoSSe and MoSe<sub>2</sub>

**Supporting Material Note 10:** No Rashba spin splitting is observed in few-layer MoS<sub>2</sub> (Fig. S18a, zoomed red marked region) and MoSe<sub>2</sub> (Fig. S18b, zoomed green marked region). Zeeman splitting at CBM is also negligible for MoS<sub>2</sub> (Fig. S18a, zoomed violet marked region) and MoSe<sub>2</sub> (Fig. S18b, zoomed violet marked region). It is already discussed that MoSe<sub>2</sub> shows entirely DM behaviour through MoS<sub>2</sub> shows FM character with a low moment at the lower external magnetic field. Due to the absence of all these crucial parameters, magnetic

enhancement of photocurrent is not attainable for MoS<sub>2</sub> and MoSe<sub>2</sub>. Little enhancement of photocurrent in the LSV plot of MoS<sub>2</sub> (Fig. S11b) and MoSe<sub>2</sub> (Fig. S11a) can be attributed as magneto-hydrodynamic flow.

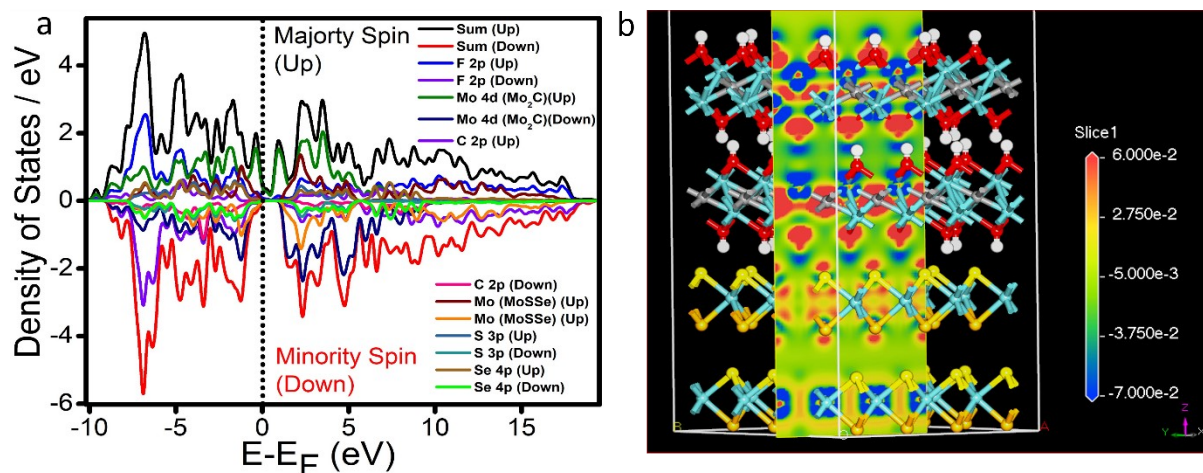

**Fig. S21.** (a) PDOS plot for Mo<sub>2</sub>CT<sub>x</sub>/MoSSe. (b) EDD slice for Mo<sub>2</sub>CT<sub>x</sub>/MoSSe.

**Supporting Material Note 11:** PDOS plot (Fig. S21a) for Mo<sub>2</sub>CT<sub>x</sub>/MoSSe shows a strong degree of overlap with the Mo atoms in the MoSSe layer and the Mo atoms in the Mo<sub>2</sub>CT<sub>x</sub> layer, indicating a strong Mo-Mo 4d interaction acting as a charge transfer pathway between the two layers. MXene acts as a strong electrocatalyst for reducing overpotential and reducing photo-generated carrier recombination by facilitating rapid charge separation<sup>13</sup>. Thus, a strong degree of overlap increased DOS at the Fermi level, and a low bandgap is important for the heterostructure. For MoSSe, a negligible bandgap for the spin-polarized  $\alpha$  DOS is observed while a bandgap for the  $\beta$  states is observed, indicating a semi-metal-like nature of the heterostructure, which provides the crucial enhancement in electronic conductivity essential for charge separation. The OH functional groups also play a very important role at the interface as observed from the EDD plot (Fig. S21b), a significant interaction between the H atoms of the OH groups and S/Se atoms in the Se layer can be seen. In Mo<sub>2</sub>CT<sub>x</sub>/MoSSe, an increase in DOS peak width and increment in DOS value indicates strong hybridization at the interface and improved charge mobility. The EDD plots show significant enrichment of electron density over the S and Se atoms in MoSSe along with a depletion around the functional groups in the Mo<sub>2</sub>C layer, indicating a high degree of charge transfer between the two layers from Mo<sub>2</sub>C to MoSSe.

## References:

- 1 W. Niu, T. Moehl, P. Adams, X. Zhang, R. Lefèvre, A. M. Cruz, P. Zeng, K. Kunze, W. Yang and S. D. Tilley, *Energy Environ. Sci.*, 2022, 2002–2010.
- 2 S. Gopalakrishnan, G. Paulraj, M. K. Eswaran, A. Ray, N. Singh and K. Jeganathan, *Chemosphere*, 2022, **302**, 134708.
- 3 M. Kumar, B. Meena, P. Subramanyam, G. Ummethala, S. R. K. Malladi, S. Dutta-Gupta and C. Subrahmanyam, *Energy and Fuels*, 2023, **37**, 2340–2349.
- 4 W. Yang, J. H. Kim, O. S. Hutter, L. J. Phillips, J. Tan, J. Park, H. Lee, J. D. Major, J. S. Lee and J. Moon, *Nat. Commun.*, 2020, **11**, 861.
- 5 H. Lin, S. Li, G. Yang, K. Zhang, D. Tang, Y. Su, Y. Li, S. Luo, K. Chang and J. Ye, *Adv. Funct. Mater.*, 2020, **2007071**, 1–9.
- 6 S. Gopalakrishnan, M. R. Sahoo, A. Ray, N. Singh, S. Harish, E. S. Kumar and M. Navaneethan, *Sustain. Energy Fuels*, 2023, **7**, 1687–1697.
- 7 F. Lin, R. Tian, P. Dong, G. Jiang, F. He, S. Wang, R. Fu, C. Zhao, Y. Y. Gu and S. Wang, *J. Colloid Interface Sci.*, 2023, **631**, 133–142.
- 8 M. Wang, S. Wang, Q. Zhang, S. Pan, Y. Zhao and X. Zhang, *Sol. RRL*, 2022, **6**, 2100798.
- 9 I. H. Kwak, I. S. Kwon, J. H. Lee, Y. R. Lim and J. Park, *J. Mater. Chem. C*, 2021, **9**, 101–109.
- 10 K. Roy, S. Maitra, D. Ghosh, P. Kumar and P. Devi, *Chem. Eng. J.*, 2022, 435.
- 11 L. Hu, J. Wang, H. Wang, Y. Zhang and J. Han, , DOI:10.1021/acsami.2c22423.
- 12 R. Ghosh, B. Papnai, Y. S. Chen, K. Yadav, R. Sankar, Y. P. Hsieh, M. Hofmann and Y. F. Chen, *Adv. Mater.*, 2023, **35**, 1–7.
- 13 K. R. G. Lim, A. D. Handoko, L. R. Johnson, X. Meng, M. Lin, G. S. Subramanian, B. Anasori, Y. Gogotsi, A. Vojvodic and Z. W. Seh, *ACS Nano*, 2020, **14**, 16140–16155.
